# Supplementary material
Source: PubMed Central journal article supplement (PMC3781774)

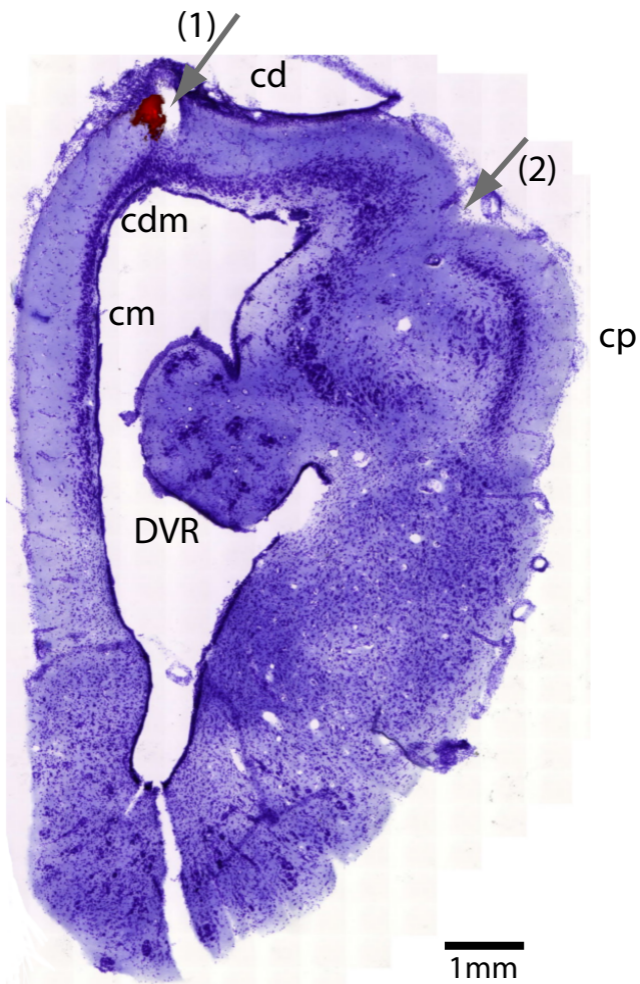

Supplement: NIHMS54707-supplement-S2.pdf [file NIHMS54707-supplement-S2.pdf]
